# Supplementary material
Source: publisher figshare collection journal article supplement (https://diabetesjournals.figshare.com/ndownloader/files/28749156)
Supplement: Supplementary file 1 [file 28749156]

# SUPPLEMENTARY MATERIAL

Exploring the burden of mealtime insulin dosing in adults and children with type 1 diabetes

**Authors:** Wendy Lane,1 Emma Lambert,2 Jesso George,3 Naveen Rathor,3 Nandu Thalange4

1Mountain Diabetes and Endocrine Center, Asheville, North Carolina.

2Ipsos MORI, London, UK.

3Novo Nordisk Service Centre India Private Ltd., Bangalore, India.

4Al Jalila Children's Specialty Hospital, Al Jaddaf, Dubai, United Arab Emirates.

# Supplementary methods

Incentives were offered in the form of reward points for participants (incentive for original survey: 20 USD/15 GBP/17 EUR/25 CAD), or bank transfer/Amazon vouchers to healthcare professionals (range value: 9–53 USD, based on local requirements and type of physician), with at least 10% of the agreed honorarium being donated to the participants’ choice of registered charities.

**Supplementary Table S1. Optimal prandial bolus timing in clinical studies**

| **Study Reference** | **Rapid-acting insulin analogue** | **CSII or MDI** | **Time of insulin administration in relation to mealtime (min)** | **Most effective time at lowering postprandial hyperglycemia (min)** | **Postprandial glucose levels**  **(mmol/L)** |
| --- | --- | --- | --- | --- | --- |
| Cobry et al. 2010 (1) | Insulin glulisine | CSII | –20, 0, +20* | –20 | 11.0 ± 3.8 vs 13.7 ± 3.0 vs 13.8 ± 2.3 (max) |
| Luijf et al. 2010 (2) | Insulin aspart | CSII | –30, –15, 0 | –15 | 11.74 ± 0.8 vs 9.26 ± 0.72 vs 12.29 ± 0.93 (max) |
| Brunner et al. 2000 (3) | Insulin aspart | MDI | 0, +15 | 0 | 11.2 (10.4–12.0) vs 13.2 (12.3–14.2) (max) |
| Jovanovic et al. 2004 (4) | Insulin aspart | MDI | –5 to 0, +30* | – 5 to 0 | 5.7 ± 0.5 vs 8.3 ± 0.55 (max) |
| Schernthaner et al. 1998 (5) | Insulin lispro | MDI | –20, 0, +15* | –20 | n/a |
| Schernthaner et al. 2004 (6) | Insulin lispro | MDI | 0, +30 | 0 | 7.71 ± 1.83 vs 8.66 ± 2.13 (mean) |

*Up to 15, 20, and 30 min after starting to eat.

CSII, continuous subcutaneous insulin infusion; max, maximum postprandial glucose level; mean, mean postprandial glucose level; MDI, multiple daily injections; min, minutes; n/a, not available.

Adapted from Slattery et al. 2018 (7) with permission of *Diabetic Medicine* published by John Wiley & Sons Ltd on behalf of Diabetes UK, © 2017 The Authors.

**Supplementary Figure S1.** Participant flow diagram


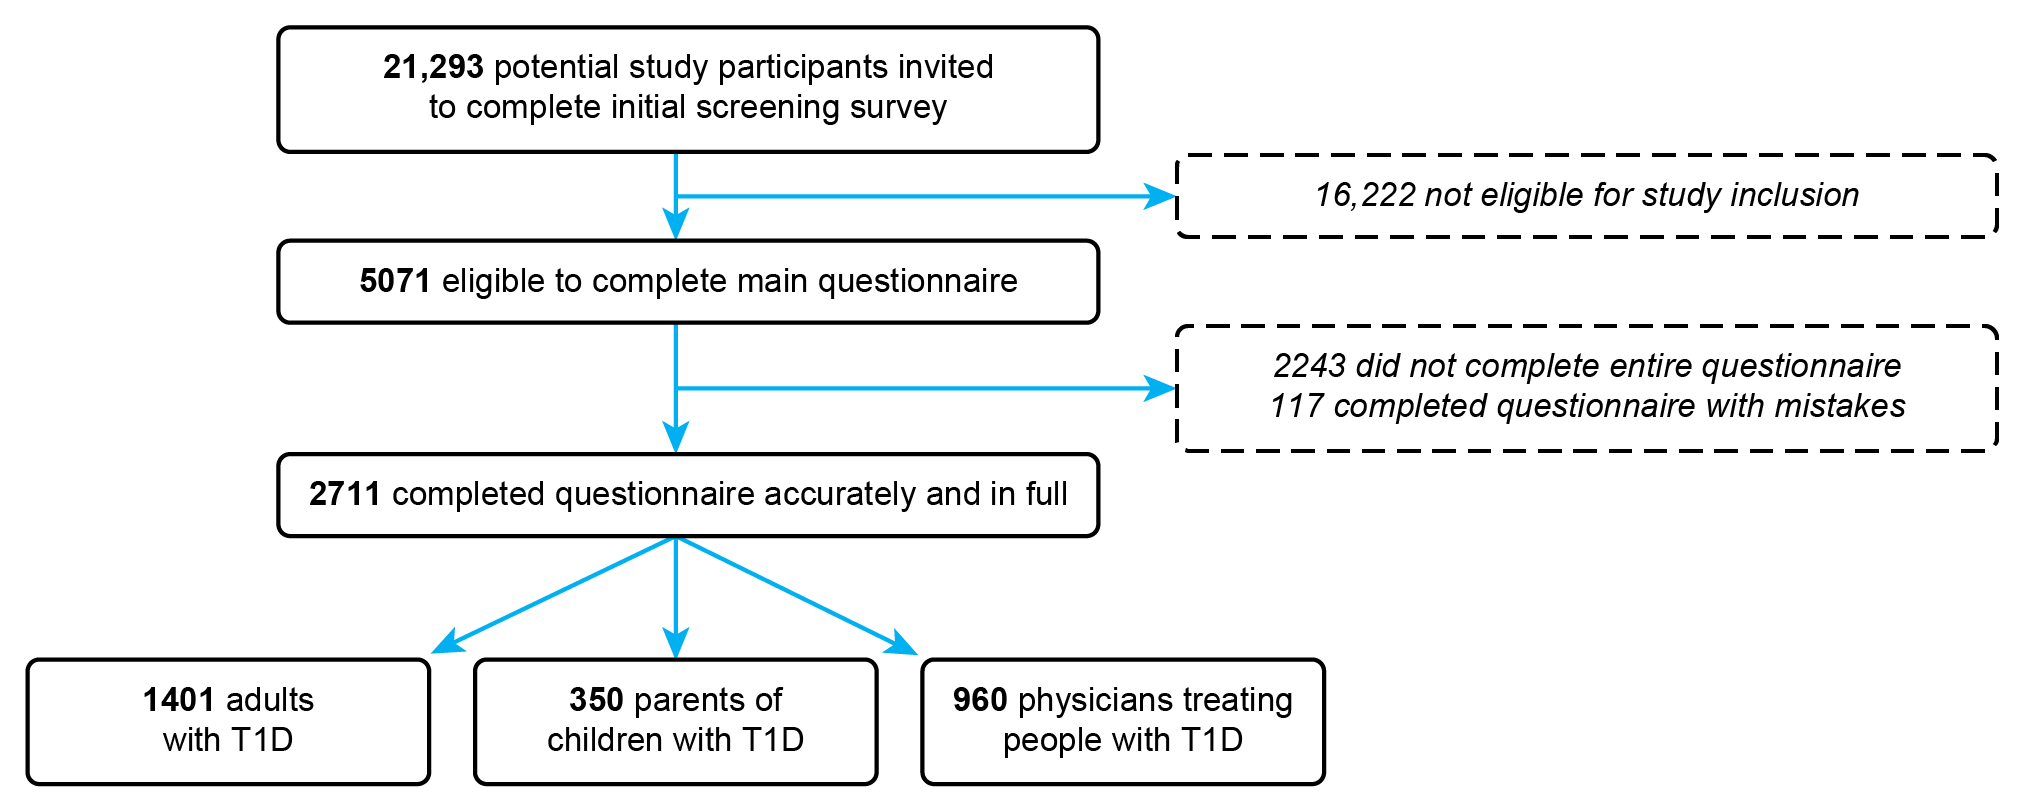


**Supplementary Figure S2.** Main challenges associated with mealtime insulin administration according to adults with type 1 diabetes (T1D)

**
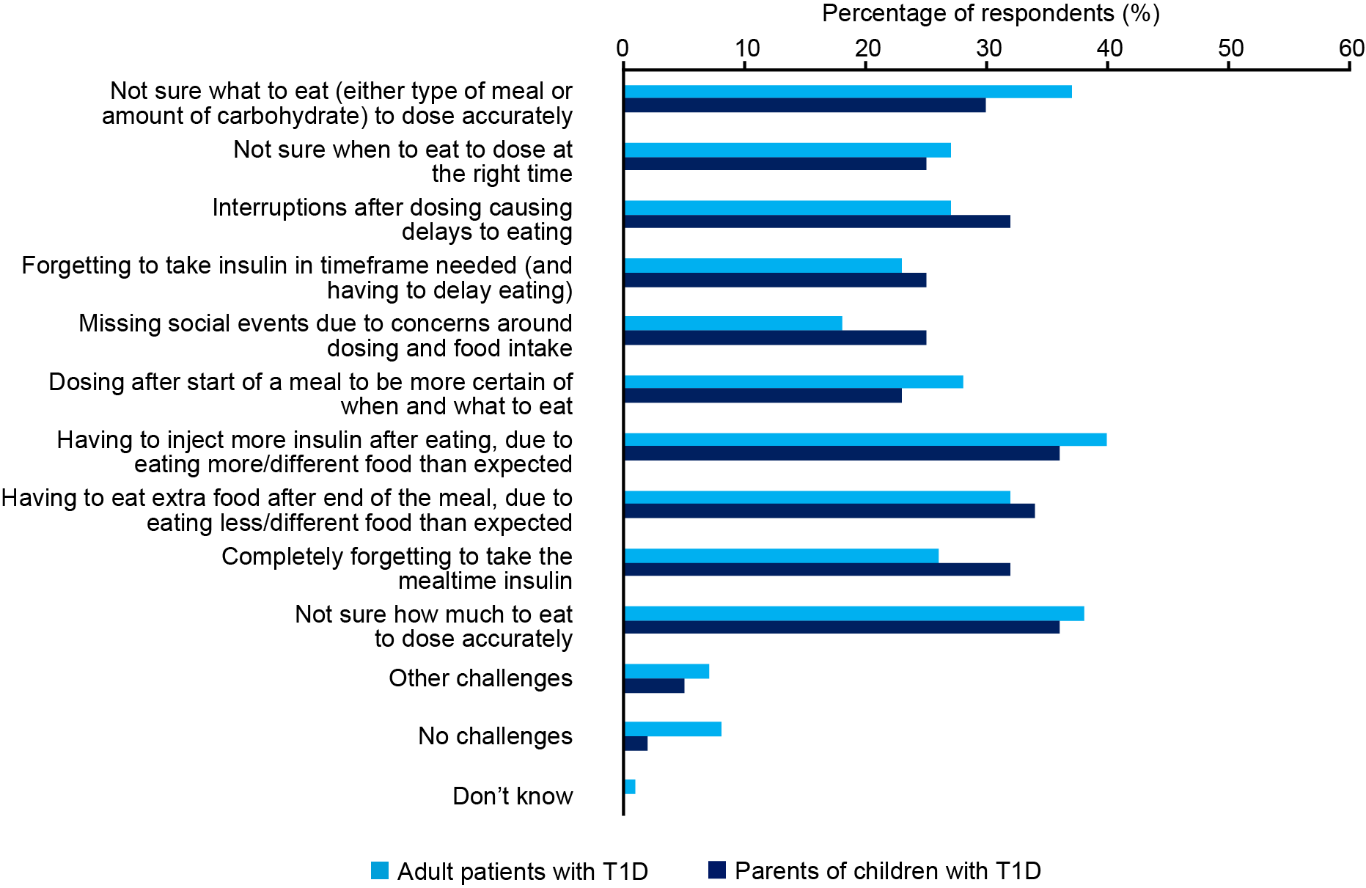
**

Please refer to the corresponding question in Supplementary material ‘Survey Questions’ 1. (Patient/Parent Questionnaire): A3.

**Supplementary Figure S3.** The extent of impact on people with type 1 diabetes regarding challenges associated with mealtime insulin administration according to healthcare professionals

**
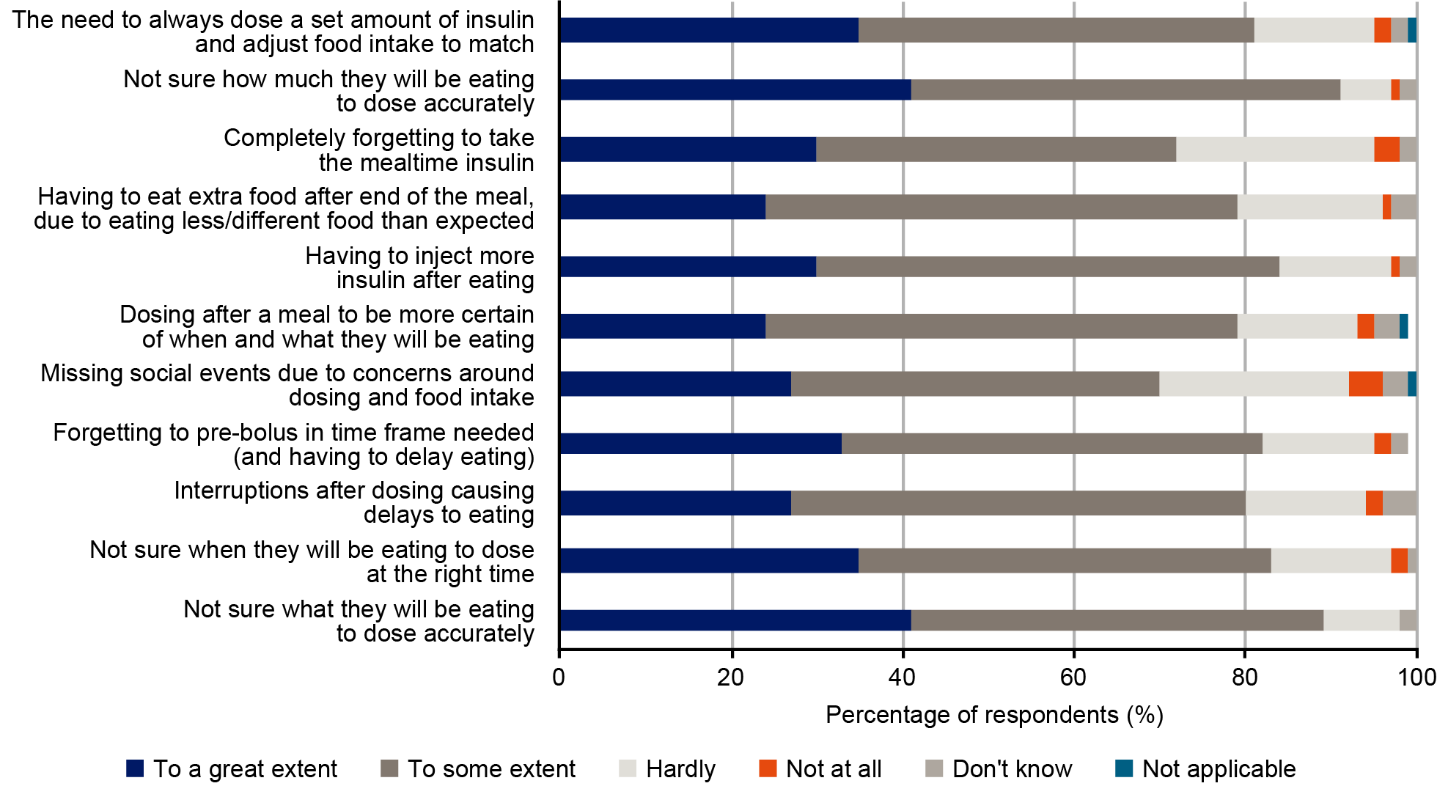
**

Please refer to the corresponding questions in Supplementary material ‘Survey Questions’ 2. (HCP Questionnaire): A4.

**Survey questions**

1. Patient/parent main questionnaire (excluding screener)

- A1. Thinking about the management of your/ your child’s diabetes, **how important**, if at all, do you believe it is to take your/ their bolus insulin (mealtime insulin) accurately? *(****Answers:*** *very important, fairly important, not very important, not at all important, don’t know)*
- A2. When pre-bolusing, **how confident** do you feel in accurately estimating the amount of insulin that you need to match your/ your child’s food intake, as indicated by your healthcare professional? *(****Answers:*** *very confident, fairly confident, not very confident, not at all confident, don’t know)*
- A3. Which of the following, if any, are the **main challenges** you/ your child experience with bolus insulin (mealtime insulin)? *(****Answers:*** *Not sure what I/they will be eating (either type of meal or amount of carbohydrate) to dose accurately; Not sure when I/they will be eating to dose at the right time; Interruptions after dosing causing delays to eating (e.g. unexpected phone call, an unexpected meeting or visitor, an engagement runs longer than expected etc.); Forgetting to pre-bolus in time frame needed (and having to delay eating); Missing social events due to concerns around dosing and food intake; Dosing post meal (after start of the meal) to be more certain of when and what I/ they are eating; Having to inject more insulin after eating, due to eating more/different food than expected; Having to eat extra food after end of the meal, due to eating less/different food than expected; Completely forgetting to take the pre-bolus insulin (mealtime insulin); Not sure how much I/ they will be eating to dose accurately; Other challenge; No challenges; Don’t know)*
- A4. Do you/your child tend to dose **a fixed amount** of bolus insulin (mealtime insulin) and then adjust your meal size to match this? (***Answers:*** *Always, occasionally, rarely, never, don’t know)*
- A5. How often, if at all, do you/ your child pre-bolus according to your Healthcare Professional’s (HCP’s) guidance/instructions and **then eat less than anticipated**? *(****Answers:*** *daily, several times a week, about once a week, about once or twice a month, about once every 3 months, about once every 6 months, about once a year, less often than once a year, never, don’t know)*
- A6. How often, if at all, do you/ your child **need to consume extra food** (e.g. carbohydrates) to prevent a hypo (low blood sugar), as a result of eating a meal that had less carbohydrates than anticipated, when you pre-bolused? *(****Answers:*** *daily, several times a week, about once a week, about once or twice a month, about once every 3 months, about once every 6 months, about once a year, less often than once a year, never, don’t know)*
- A7. How often, if at all, do you/ your child pre-bolus according to your Healthcare professional’s (HCP’s) guidance/instructions and **then eat more than you anticipated**? *(****Answers:*** *daily, several times a week, about once a week, about once or twice a month, about once every 3 months, about once every 6 months, about once a year, less often than once a year, never, don’t know)*
- A8. As a result of eating more food than you/ your child anticipated you would when you were pre-bolusing, how often, if at all, do you/they **need to take extra insulin** to correct the extra food eaten? *(****Answers:*** *daily, several times a week, about once a week, about once or twice a month, about once every 3 months, about once every 6 months, about once a year, less often than once a year, never, don’t know)*
- A9. How often, if at all, do you/your child take bolus insulin (mealtime insulin) **after** the start of the meal when you know exactly what and when you/they are eating? *(****Answers:*** *daily, several times a week, about once a week, about once or twice a month, about once every 3 months, about once every 6 months, about once a year, less often than once a year, never, don’t know)*
- A10. How often, if at all, do you/ your child **forget to take** your bolus insulin (mealtime insulin) completely before a meal? *(****Answers:*** *daily, several times a week, about once a week, about once or twice a month, about once every 3 months, about once every 6 months, about once a year, less often than once a year, never, don’t know)*
- A11. How often, if at all, do you/ your child **forget to pre-bolus (within the needed timeframe)** before a meal) and have to delay eating? *(****Answers:*** *daily, several times a week, about once a week, about once or twice a month, about once every 3 months, about once every 6 months, about once a year, less often than once a year, never, don’t know)*
- A12. How often, if at all, would you say you pre-bolus and **then the situation changes** (e.g. you are unsure when, what, how much you/ they will eat, there are interruptions that prevent you/them from eating) meaning you/they end up not taking the right amount of insulin (the first time)? *(****Answers:*** *daily, several times a week, about once a week, about once or twice a month, about once every 3 months, about once every 6 months, about once a year, less often than once a year, never, don’t know)*
- A14. Thinking about the need to pre-bolus before eating, in general, to what extent if at all, does managing this **negatively impact** you/ your child in your day to day life (social life, mood, independence, life in general, relationship with others)? *(****Answers:*** *to a great extent, to some extent, hardly, not at all, don’t know, not applicable)*
- A15. How often, if at all, do you/ your child **decide not to eat out** (e.g. in restaurants, at a friend’s house, social events, at the work canteen) due to being unsure of how much bolus insulin (mealtime insulin) you need to take? *(****Answers:*** *daily, several times a week, about once a week, about once or twice a month, about once every 3 months, about once every 6 months, about once a year, less often than once a year, never, don’t know)*
- A16. Here is a list of things, both positive and negative, that some people may feel about having to take bolus insulin (mealtime insulin) at a set time before every meal. Which, if any, of the following **do you feel about you/ your child having to take bolus insulin** (mealtime insulin) at a set time before every meal? *(****List:*** *refer to Suppl. Fig 3)*
- A17. In general, how do you/ your child feel after a meal when **thinking about your post meal blood glucose levels**? *(****Answers****: I never worry about it, I occasionally worry about it, I often worry about it, I always worry about it, don’t know, none of the above)*
- A18. Given the choice, when **would you/ your child prefer** to take your bolus insulin (mealtime insulin)? *(****Answers:*** *15-20 minutes before you/they eat, immediately before you/they eat, immediately after you/they eat, no preference, don’t know, none of the above)*
- A19. If you/ your child were able to **avoid pre-bolusing** (by taking bolus insulin either immediately before your meal or after the start of your meal), what, if any, impact would this have on your/ their overall quality of life? *(****Answers:*** *a very positive impact, a fairly positive impact, no impact on my/their quality of life, a fairly negative impact, a very negative impact, don’t know)*

1. HCP main questionnaire (excluding screener)

- A1. To the best of your knowledge, how confident do you think your patients with type 1 diabetes feel in accurately estimating the amount of bolus insulin needed to match their food intake? *(****Answers:*** *very confident, fairly confident, not very confident, not at all confident, don’t know)*
- A2. Thinking about your patients with type 1 diabetes and their need to pre-bolus, to what extent, if at all, do you believe this **creates extra burden in their day to day life** with diabetes? *(****Answers:*** *to a great extent, to some extent, hardly, not at all, don’t know)*
- A3. Thinking about your patients with type 1 diabetes and their need to pre-bolus, to what extent, if at all, do you believe this **negatively impacts their emotional wellbeing**? (***Answers:*** *to a great extent, to some extent, hardly, not at all, don’t know)*
- A4. To what extent, if at all, do you believe each of the following represents a challenge faced by your patients with type 1 diabetes in relation to pre-bolusing? (***Answers:*** *Not sure what they will be eating to dose accurately (either type of meal or amount of carbohydrate; Not sure when they will be eating to dose at the right time; Interruptions after dosing causing delays to eating; Forgetting to pre-bolus in time frame needed (and having to delay eating; Missing social events due to concerns around dosing and food intake; Dosing post meal to be more certain of when and what they will be eating; Having to inject more insulin after eating, i.e. taking more insulin due to eating more/different food than expected; Having to eat extra food after end of the meal, due to eating less/different food than expected; Completely forgetting to take the mealtime insulin;* *Not sure how much they will be eating to dose accurately; The need to always dose a set amount of insulin and adjust food intake to match*)
- A5. How often, if at all, do your patients with type 1 diabetes discuss with you any challenges around mealtimes that they are facing with taking bolus insulin (e.g. timing the dose, estimating the right amount etc.)? *(****Answers:*** *always, sometimes, hardly ever, never, don’t know)*
- A6. To what extent, if at all, do you believe your patients with type 1 diabetes’ quality of life would improve if they could have a bolus insulin which they could take **immediately before their meal**? *(****Answers:*** *to a great extent, to some extent, hardly, not at all, don’t know)*
- A7. To what extent, if at all, do you believe your patients with type 1 diabetes’ quality of life would improve if they could have a bolus insulin which they could take **after the start of** their meal? *(****Answers:*** *to a great extent, to some extent, hardly, not at all, don’t know)*.

**References**

1. Cobry E, McFann K, Messer L, et al.Timing of meal insulin boluses to achieve optimal postprandial glycemic control in patients with type 1 diabetes. *Diabetes Technol Ther.* 2010;12:173-177

2. Luijf YM, van Bon AC, Hoekstra JB, Devries JH.Premeal injection of rapid-acting insulin reduces postprandial glycemic excursions in type 1 diabetes. *Diabetes Care.* 2010;33:2152-2155

3. Brunner GA, Hirschberger S, Sendlhofer G, et al.Post-prandial administration of the insulin analogue insulin aspart in patients with Type 1 diabetes mellitus. *Diabet Med.* 2000;17:371-375

4. Jovanovic L, Giammattei J, Acquistapace M, Bornstein K, Sommermann E, Pettitt DJ.Efficacy comparison between preprandial and postprandial insulin aspart administration with dose adjustment for unpredictable meal size. *Clin Ther.* 2004;26:1492-1497

5. Schernthaner G, Wein W, Sandholzer K, Equiluz-Bruck S, Bates PC, Birkett MA.Postprandial insulin lispro. A new therapeutic option for type 1 diabetic patients. *Diabetes Care.* 1998;21:570-573

6. Schernthaner G, Wein W, Shnawa N, Bates PC, Birkett MA.Preprandial vs. postprandial insulin lispro-a comparative crossover trial in patients with Type 1 diabetes. *Diabet Med.* 2004;21:279-284

7. Slattery D, Amiel SA, Choudhary P.Optimal prandial timing of bolus insulin in diabetes management: a review. *Diabet Med.* 2018;35:306-316
